# Supplementary material
Source: publisher site journal article supplement (https://www.dovepress.com/article/422598)
Supplement: Supplementary file 1 [file get_supplementary_file.php]

**Supplementary Table S1 Clinical information for all HCM patients**

| **Sample** | **Gender** | **Chest pain** | **Shortness of breath** | **ECG changes** | **Cardiac amylase** | **Hypertension** | **Hyperlipidemia** | **Interventricular septum** | **Left ventricular outflow tract obstruction** |
| --- | --- | --- | --- | --- | --- | --- | --- | --- | --- |
| 1 | Female | No | Yes | ST-T change | No abnormalities | No | No | Thickening | No |
| 2 | Male | Yes | Yes | V-fib, high risk of premature repolarization type 3 electrical storm | High | Yes | No | Thickening | No |
| 3 | Male | Yes | Yes | ST-T wave abnormalities | High | Yes | Yes | Thickening | No |
| 4 | Female | Yes | Yes | T wave abnormalities | High | Yes | No | Thickening | No |
| 5 | Female | No | Yes | ST-T change | High | No | No | septal tumor | No |
| 6 | Male | Yes | Yes | ST-T change | High | Yes | Yes | Thickening | No |
| 7 | Female | Yes | Yes | ST-T wave abnormalities | High | Yes | Yes | Thickening | Yes |
| 8 | Female | Yes | Yes | ST-T wave abnormalities | High | Yes | Yes | Thickening | Yes |
| 9 | Female | No | Yes | ST-T change | High | Yes | No | Thickening | No |
| 10 | Male | No | Yes | ST-T wave abnormalities | High | Yes | No | Thickening | Yes |
| 11 | Male | No | Yes | ST-T change | No abnormalities | No | No | Thickening | No |
| 12 | Male | Yes | Yes | High left ventricular voltage, abnormal ST-T in some leads | High | Yes | No | Thickening | Yes |
| 13 | Female | Yes | Yes | Part of the lead QRS wave, part of the lead ST-T anomaly | High | Yes | Yes | Thickening | No |
| 14 | Female | No | Yes | ST-T wave abnormalities | High | No | No | Thickening | No |

**Supplementary Table S2 Sequencing data information**

| **Sample** | **Total reads** | **Total bases** | **Q30%** | **GC%** |
| --- | --- | --- | --- | --- |
| MKHS200009134 | 74492668 | 11173900200 | 94.37 | 51.88 |
|  |  |  |  |  |
| MKHS200017468 | 71473956 | 10721093400 | 93.1 | 51.61 |
|  |  |  |  |  |
| MKHS200017475 | 83774360 | 12566154000 | 92.64 | 51.83 |
|  |  |  |  |  |
| MKHS200017502 | 86036654 | 12905498100 | 92.88 | 51.51 |
|  |  |  |  |  |
| MKHS200017509 | 58324810 | 8748721500 | 93.64 | 51.24 |
|  |  |  |  |  |
| MKHS200017513 | 86507322 | 12976098300 | 90.94 | 51.99 |
|  |  |  |  |  |
| MKHS200039213 | 74433610 | 11165041500 | 93.86 | 51.77 |
|  |  |  |  |  |
| MKHS200039219 | 82882030 | 12432304500 | 93.73 | 52.74 |
|  |  |  |  |  |
| MKHS200039231 | 85239200 | 12785880000 | 94.38 | 51.24 |
|  |  |  |  |  |
| TKQX210000940 | 106788576 | 16018286400 | 92.74 | 52 |
|  |  |  |  |  |
| TKQX210001484 | 88372486 | 13255872900 | 93.38 | 52.86 |
|  |  |  |  |  |
| TKQX210001882 | 73852768 | 11077915200 | 93.87 | 52.14 |
|  |  |  |  |  |
| TKQX210003630 | 98305686 | 14745852900 | 93.16 | 51.37 |
|  |  |  |  |  |
| TKQX210003631 | 88445688 | 13266853200 | 93.67 | 51.96 |

**Supplementary Table S3 23 shared GO terms in all HCM transcriptomic data**

| ID | ONTOLOGY | Description |
| --- | --- | --- |
| GO:0003735 | MF | structural constituent of ribosome |
| GO:0005840 | CC | ribosome |
| GO:0015934 | CC | large ribosomal subunit |
| GO:0044391 | CC | ribosomal subunit |
| GO:0015935 | CC | small ribosomal subunit |
| GO:0005788 | CC | endoplasmic reticulum lumen |
| GO:0016616 | MF | oxidoreductase activity, acting on the CH-OH group of donors, NAD or NADP as acceptor |
| GO:0062023 | CC | collagen-containing extracellular matrix |
| GO:0018149 | BP | peptide cross-linking |
| GO:0007599 | BP | hemostasis |
| GO:0007596 | BP | blood coagulation |
| GO:0050817 | BP | coagulation |
| GO:0072593 | BP | reactive oxygen species metabolic process |
| GO:0019838 | MF | growth factor binding |
| GO:0006099 | BP | tricarboxylic acid cycle |
| GO:0033865 | BP | nucleoside bisphosphate metabolic process |
| GO:0033875 | BP | ribonucleoside bisphosphate metabolic process |
| GO:0034032 | BP | purine nucleoside bisphosphate metabolic process |
| GO:0006637 | BP | acyl-CoA metabolic process |
| GO:0035383 | BP | thioester metabolic process |
| GO:0043648 | BP | dicarboxylic acid metabolic process |
| GO:0031093 | CC | platelet alpha granule lumen |
| GO:0051287 | MF | NAD binding |

**Supplementary Table S4 11 common KEGG signaling pathways in all HCM transcriptomic data**

| ID | Description |
| --- | --- |
| hsa03010 | Ribosome |
| hsa01200 | Carbon metabolism |
| hsa00620 | Pyruvate metabolism |
| hsa00010 | Glycolysis / Gluconeogenesis |
| hsa00020 | Citrate cycle (TCA cycle) |
| hsa04146 | Peroxisome |
| hsa00640 | Propanoate metabolism |
| hsa00280 | Valine, leucine and isoleucine degradation |
| hsa01212 | Fatty acid metabolism |
| hsa00071 | Fatty acid degradation |
| hsa05169 | Epstein-Barr virus infection |
